# Supplementary material for: Chemotherapy-Induced Changes in the Lung Microenvironment: The Role of MMP-2 in Facilitating Intravascular Arrest of Breast Cancer Cells
Source: MDPI journal article supplement (doi:10.3390/ijms221910280), 2021-09-24
Supplement: s1 [file s1]

**Supplementary Information for:**

**Chemotherapy-induced changes in the lung  
microenvironment: the role of MMP-2 in facilitating  
intravascular arrest of breast cancer cells**

Justin D. Middleton<sup>1,2</sup>, Subhakeertana Sivakumar<sup>1</sup>, Tsonwin Hai<sup>1,2\*</sup>

<sup>1</sup> Department of Biological Chemistry and Pharmacology

<sup>2</sup> Molecular, Cellular, and Developmental Biology Program

\*Correspondence: Tsonwin Hai

Email: [hai.2@osu.edu](mailto:hai.2@osu.edu)

**This PDF file includes:**

Figures S1 to S7

Tables S1 to S2

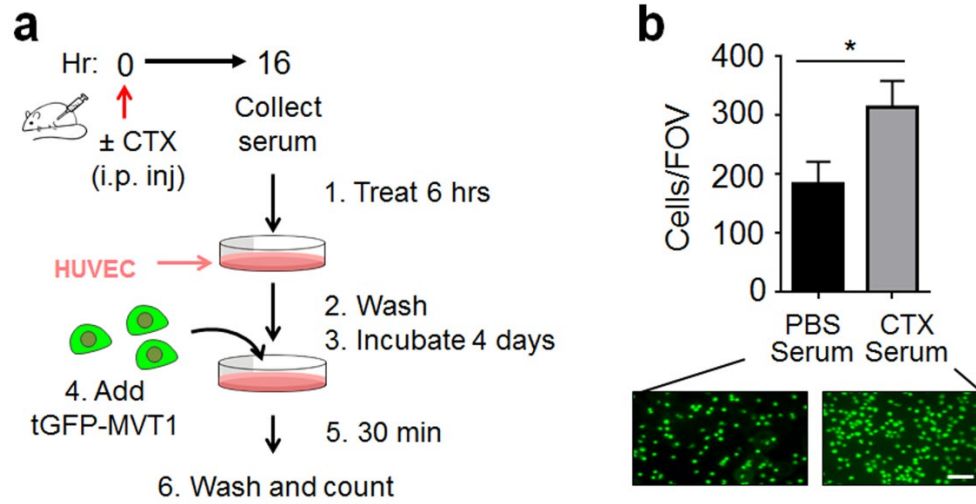

**Figure S1.** CTX increases the adhesiveness of human umbilical vein endothelial cells (HUVECs). (a) A schematic of the experiment, which is the same as that in Figure 3a, except using HUVEC monolayers (rather than mLEC) and a 4-day incubation (rather than 2-day). (b) Average cell count per field of view (FOV) from nine images obtained per well (N=12-13 from 3 independent experiments). Scale bar: 50  $\mu$ m. Bars indicate mean  $\pm$  SEM; Student's t-test; \* $P < 0.05$ .

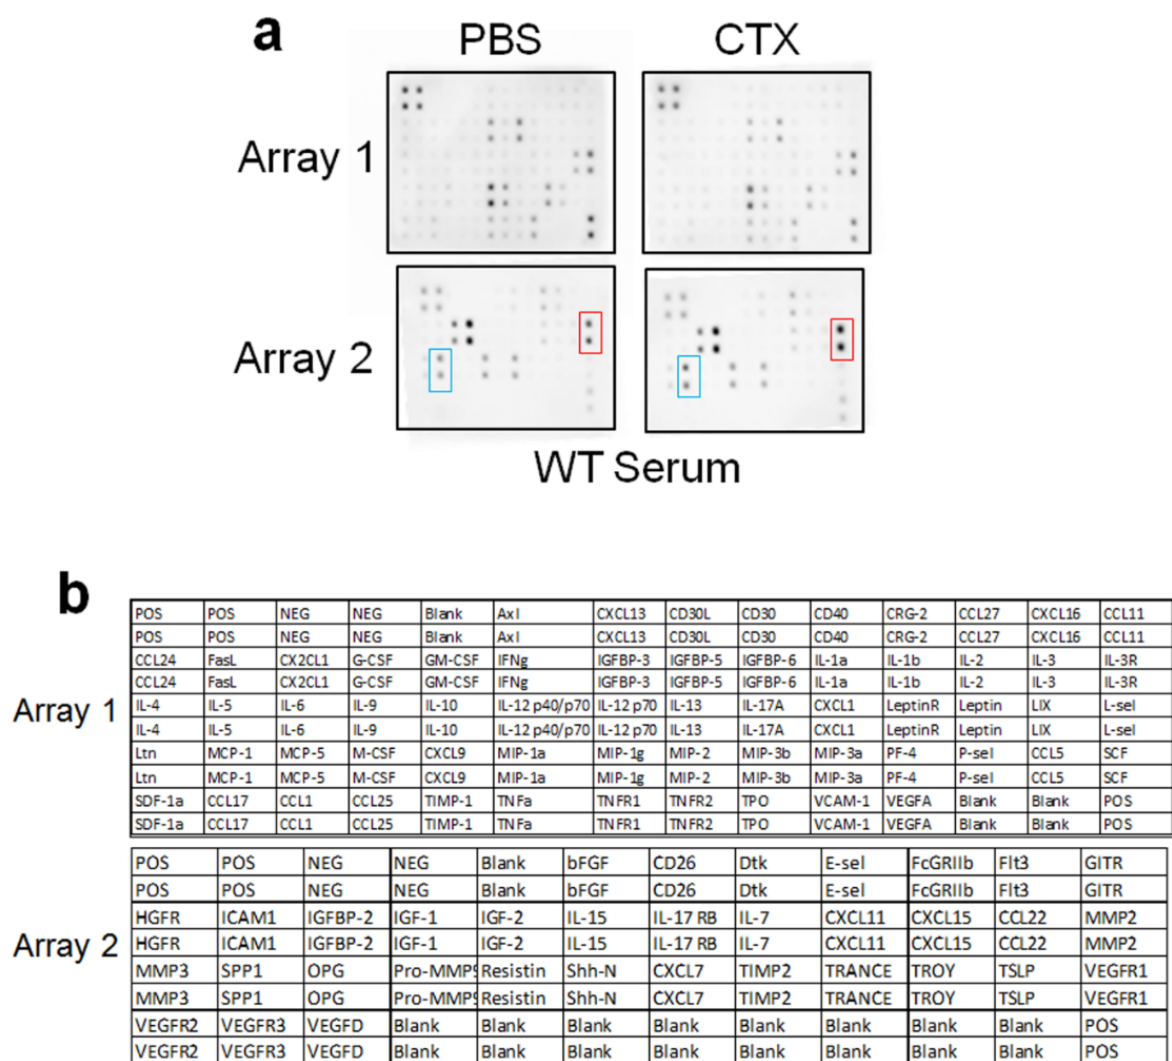

**Figure S2.** Protein arrays comparing WT sera. (a) Images of the two arrays comparing sera from WT mice at 16 hours after treatment with CTX or PBS. Red box: MMP-2, blue box: OPN. (b) A map of the proteins detected in the arrays.

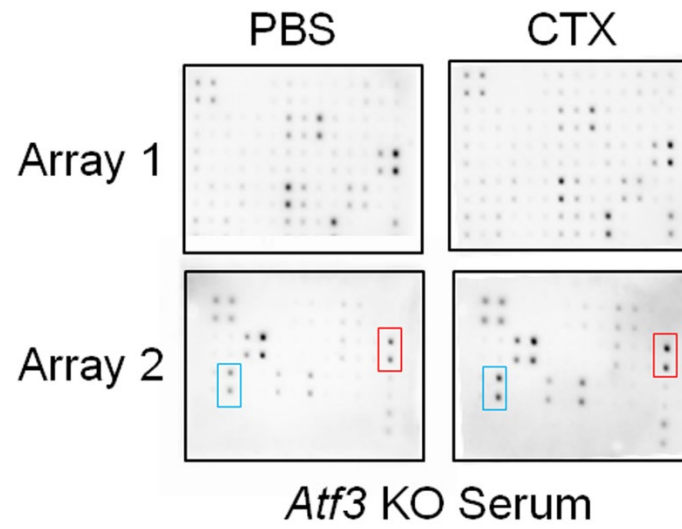

**Figure S3.** Protein arrays comparing *Atf3* KO sera. Images of the two arrays comparing sera from *Atf3* KO mice at 16 hours after treatment with CTX or PBS. Red box: MMP-2, blue box: OPN.

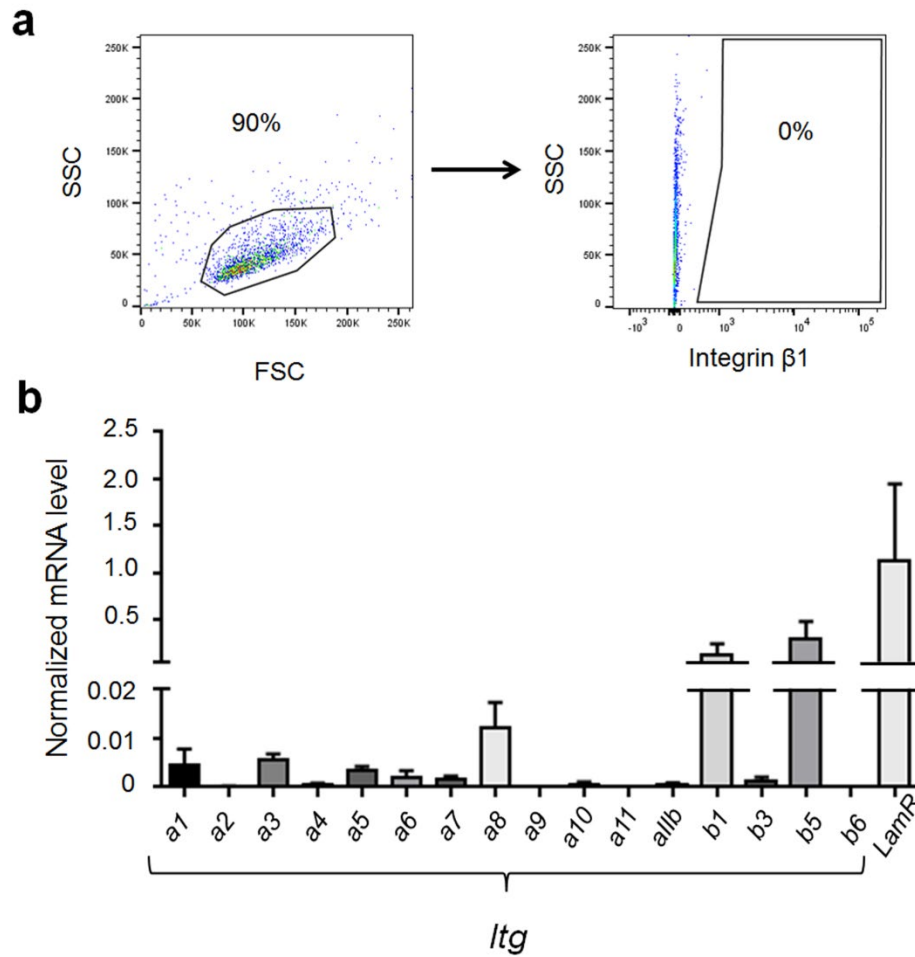

**Figure S4:** High levels of integrin  $\beta 1$  and laminin receptor (*LamR*) mRNA are present in tGFP-Met1 cells. (a) A representative image of the initial gating of tGFP-MVT1 cancer cells to remove debris and cell aggregates, followed by a representative image of positive integrin  $\beta 1$  signal gating as determined using fluorescence minus one control. (b) mRNA levels *LamR* and the indicated integrins (*Itg*) in tGFP-Met1 cells were analyzed by reverse transcriptase coupled with quantitative polymerase chain reaction (RT-qPCR). Signals were normalized against glyceraldehyde 3-phosphate dehydrogenase (*Gapdh*) (from 3 independent experiments). Bars indicate mean  $\pm$  SEM.

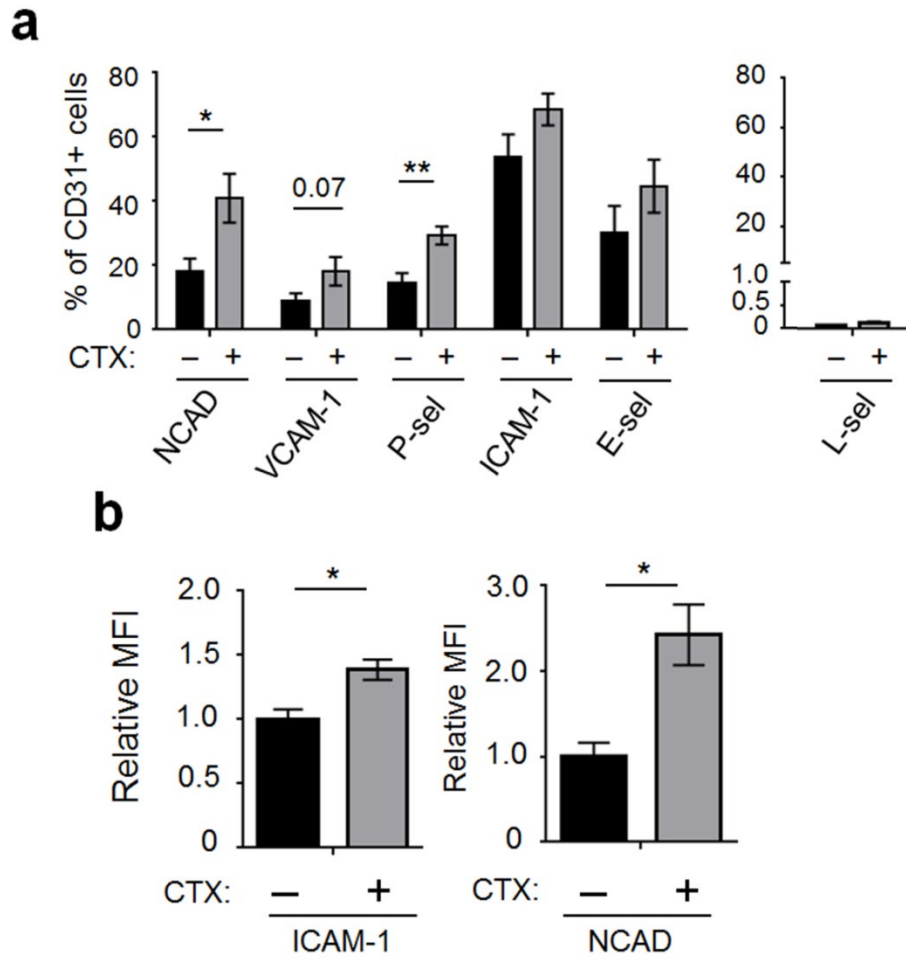

**Figure S5.** CTX increases the presence of cell adhesion molecules (CAMs) on the surface of lung endothelial cells. (a) Percentage (%) of CD31<sup>+</sup> cells from the lung positive for the indicated CAMs (N=9-14 mice from 3 independent experiments). NCAD: N-cadherin; VCAM-1: vascular cell adhesion molecule 1; P-sel: P-selectin; ICAM-1: Intercellular adhesion molecule 1; E-sel: E-selectin; L-sel: L-selectin. (b) Relative mean fluorescent intensity (MFI) of the indicated CAMs on CD31<sup>+</sup> lung cells (N=9-14 mice from 3 independent experiments). Bars indicate mean  $\pm$  SEM; Student's t test; \* $P < 0.05$ , \*\* $P < 0.01$ .

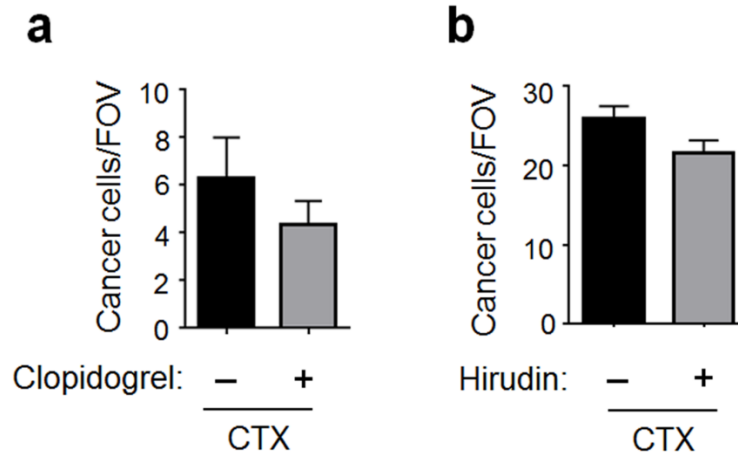

**Figure S6:** Inhibition of platelet activation did not affect intravascular cancer cell arrest. (a) Mice were pre-treated with CTX at four days before cancer cell injection (tGFP-MVT1) as in Figure 1, with the addition of intraperitoneal injection of clodidogrel (+) at 10 mg/kg or vehicle (-) 18 hours before and 2 hours after CTX pre-treatment. Lungs were collected at 9 hours after cancer cell injection for analysis (N=3-5 mice/group). (b) Mice were pre-treated with CTX at four days before cancer cell injection (tGFP-MVT1) as in Figure 1, with the addition of intravenous injection of hirudin (+) at 10 mg/kg or vehicle (-) 20 minutes prior to cancer cell injection. Lungs were collected at 3 hours after cancer cell injection for analysis (N=4 mice/group). Bars indicate  $\pm$  SEM; Student's t-test. No statistical significance was observed between the vehicle control (-) and treatment (+) groups for both drugs.

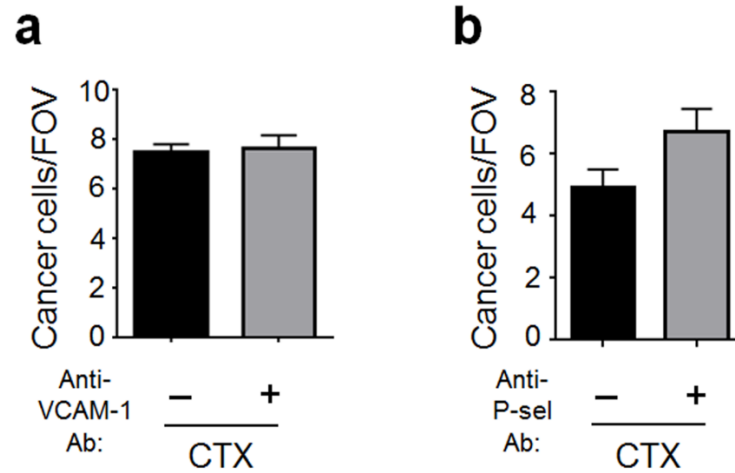

**Figure S7.** Blocking antibodies against VCAM-1 and P-sel did not affect intravascular cancer cell arrest. (a) Mice were pre-treated with CTX at four days before cancer cell injection (tGFP-MVT1) as in Figure 1, with the addition of intravenous injection of 100  $\mu$ g anti-VCAM-1 antibody (Ab, +) or 100  $\mu$ g isotype IgG antibody (-) at 2 hours prior to cancer cell injection. Lungs were collected at 3 hours after cancer cell injection for analysis (N=3-4 mice/group). (b) Same as in panel (a) except 25  $\mu$ g of the anti-P-sel antibody was used. Lungs were collected at 3 hours after cancer cell injection (N=3 mice/group). Bars indicate  $\pm$  SEM; Student's t-test. No statistical significance was observed between the control (-) and treatment (+) groups for both antibodies.

**Table S1. Primers used in this study**

| Target         | Forward                         | Reverse                          |
|----------------|---------------------------------|----------------------------------|
| <i>Itga1</i>   | 5'-TATCCTCCTGAGCGCCTTT-3'       | 5'-TGGCCTTTTGAAGAATCCAA-3'       |
| <i>Itga2</i>   | 5'-GGTTCTGCAGGATAGAAACCA-3'     | 5'-TGGACACCGTCTTCAGTAGAAA-3'     |
| <i>Itga3</i>   | 5'-GCGGAAGGACTGGGATTTAT-3'      | 5'-GATGATGTCCGTGGGATGTAG-3'      |
| <i>Itga4</i>   | 5'-AATTGGACCAAGTGAGGGACAA-3'    | 5'-TCGCTAGATCCATACACAAATGAAGT-3' |
| <i>Itga5</i>   | 5'-TCG GAG CAA CAG TTC GGG-3'   | 5'-GTGGAGCACATGCCAAGATG-3'       |
| <i>Itga6</i>   | 5'-ACCTCGGCACAGCAACCTTGA-3'     | 5'-ACGCTGCAGTTGAGAGTCTGGT-3'     |
| <i>Itga7</i>   | 5'-GATCGTCCGAGCCAACATCACA-3'    | 5'-CTAACAGCCCAGCCAGCACT-3'       |
| <i>Itga8</i>   | 5'-TCAAGGCGAGGAACAGCAA-3'       | 5'-CCTTGGGAACCCGATGGT-3'         |
| <i>Itga9</i>   | 5'-ATGACGGGTTCACAGATG-3'        | 5'-TGTAAGTGCAGCCAGCAA-3'         |
| <i>Itga10</i>  | 5'-GGCTCCAACAGT ATCTATCC-3'     | 5'-TGCTCTCACAACCTCTTCC-3'        |
| <i>Itga11</i>  | 5'-GGACTTCTTCACCGACCAGG-3'      | 5'-CAGCCTCAGGTTGCAGATGA-3'       |
| <i>Itga11b</i> | 5'-ACATTGAGGGCTTTGAGAGGCT-3'    | 5'-TTGCCACAGGCAACATCACG-3'       |
| <i>Itgav</i>   | 5'-TGAAGTCTTTCGGCTCTGCG-3'      | 5'-CATCCTGGAGGACGTGCTGG-3'       |
| <i>Itgb1</i>   | 5'-GCAGGTGTCGTGTTTGTGAATGCT-3'  | 5'-ACAAGTTGGCCCTTGAACTTGGG-3'    |
| <i>Itgb3</i>   | 5'-GGACACAGCCAACAACCCAC-3'      | 5'-AGGAGGCATTCTGGGACAAAG-3'      |
| <i>Itgb5</i>   | 5'-TGTTTCAGCTACACAGAACTGCCCA-3' | 5'-TTTGGAACCTTGCAAACCTCTCGGC-3'  |
| <i>Itgb6</i>   | 5'-AGATGGACTTGTTCTTGGGTG-3'     | 5'-GACAGCAAGCTGGCAGGCATTG-3'     |
| <i>LamR</i>    | 5'-GGTGGCACCAACCTTGACTTTC-3'    | 5'-GTCAGCAGGATTCTCGATGGCA-3'     |
| <i>Gapdh</i>   | 5'-CAA CGG GAA GCC CAT CA-3'    | 5'-CGG CCT CAC CCC ATT T-3'      |

**Table S2. Antibodies used in this study**

| Name/Property     | Assay          | Dilution/Amount | Item #      | Company         |
|-------------------|----------------|-----------------|-------------|-----------------|
| anti-CD16/CD32 Fc | Flow cytometry | 0.5 µg/100 µl   | 14-0161-86  | Invitrogen      |
| anti-CD31         | Flow cytometry | 0.125 µg/100 µl | 12-0311-82  | eBioscience     |
| anti-ITGB1        | Flow cytometry | 0.125 µg/100 µl | 47-0291-82  | Invitrogen      |
| anti-P-sel        | Blocking       | 25 µg/mouse     | 12-0626-82  | ThermoFisher    |
| anti-tGFP         | IF             | 1:2000          | PA5-22688   | Invitrogen      |
| anti-VCAM-1       | Blocking       | 100 µg/mouse    | NBP1-26587  | Novus           |
| CD31 MicroBeads   | MACS           | 10 µl/100 µl    | 130-097-418 | Miltenyi Biotec |
| Mouse IgG         | Blocking       | 25 µg/mouse     | 12-4714-82  | Invitrogen      |
| Rat IgG           | Blocking       | 25 µg/mouse     | MAB005      | Novus           |

IF: Immunofluorescence
